# Supplementary material for: Single-residue linear and conformational B cell epitopes prediction using random and ESM-2 based projections
Source: PubMed Central journal article supplement — Brief Bioinform. 2024 Mar 14;25(2):bbae084. doi: 10.1093/bib/bbae084 (PMC10940830; doi:10.1093/bib/bbae084), 2024-03-14
Supplement: supp_mat_bbae084.pdf [file supp_mat_bbae084.pdf]

# Supplementary Material

## Model architecture

The input for the model is the AA as sequences. Each AA is represented as a separate token that is represented by a numerical vector (embedding), inspired by Natural Language Processing (NLP) techniques. Four options were tested for the AA representation: 1. Random - The AA were represented through 10-dimensions embedding vectors. The embedding is initialized randomly and learned in the training process. 2. Kidera - The AA were represented through 10-dimensions embedding vectors, initiated as their Kidera factors values, and learned in the training process. The Kidera factors are a set of properties of each AA, We assumed that starting from these representations would give an advantage for the embedding learning. 3. Kidera + biochemical - The AA were represented through 10-dimensions embedding vectors, initiated as their Kidera factors values, and learned in the training process. The biochemical properties of each AA are concatenated to the embedding output of each AA. 4. ESM-2/ESM-IF1 - each AA is represented in a dimension of 1280/512, respectively, of the pre-trained ESM models. ESM is an embedding representation that was learned by Large Language Model (LLM) on an extensive dataset, with impressive performances. And predict an embedding depending on the sequence.

The output is fed into BiLSTM or GCN. BiLSTM models have the ability to capture contextual information from both past and future tokens in a sequence. Using GCN we can represent the protein as a graph, and capture the 3D structure. Both, BiLSTM and GCN, allow the use of the whole protein to predict for each residue if it is within or outside an epitope, simultaneously for all residues. 1. BiLSTM - BiLSTM model with 2 layers. The BiLSTM produces an output for each token in the input in a dimension of 200 for the linear epitopes model or 20 for the conformational epitopes model. A dropout of 0.2/0.25 for conformational/linear epitopes is used. Each output is fed into the same MLP and reduced the dimension by half. 2. GCN - GCN model with 2 hidden layers. The output dimension of the first layer is 16, and 10 of the second layer. A node's features normalization is applied in both layers. A Relu activation and dropout of 0.2 is used. An output is produced for each node in the graph (i.e. for each AA).

The output of the BiLSTM/GCN is fed into MLP to reduce the output dimension of each AA to 1, and a Sigmoid function is applied.

We used Adam optimization, with a learning rate and L2-regularization of 0.001 for the conformational epitopes, and a learning rate of 0.001 and L2-regularization of  $10^{-6}$  for the linear epitopes.

## Supplementary Tables

|                          | AUC               | BAC               | MCC               | PR-AUC            |
|--------------------------|-------------------|-------------------|-------------------|-------------------|
| Kidera+bio up to 1023    | $0.76 \pm 0.0041$ | $0.69 \pm 0.0037$ | $0.14 \pm 0.0045$ | $0.12 \pm 0.0037$ |
| kidera +bio<br>embedding | $0.8 \pm 0.0039$  | $0.72 \pm 0.004$  | $0.14 \pm 0.002$  | $0.12 \pm 0.0024$ |
| embedding up to 1023     | $0.8 \pm 0.0023$  | $0.73 \pm 0.004$  | $0.14 \pm 0.002$  | $0.12 \pm 0.004$  |
| kidera only              | $0.76 \pm 0.0042$ | $0.69 \pm 0.004$  | $0.14 \pm 0.0024$ | $0.12 \pm 0.0049$ |
| kidera up to 1023        | $0.8 \pm 0.0045$  | $0.72 \pm 0.0051$ | $0.14 \pm 0.0032$ | $0.11 \pm 0.0037$ |
| ESM-2                    | $0.76 \pm 0.0034$ | $0.7 \pm 0.0037$  | $0.14 \pm 0.0045$ | $0.12 \pm 0.0037$ |
|                          | $0.77 \pm 0.001$  | $0.7 \pm 0.0$     | $0.14 \pm 0.0$    | $0.12 \pm 0.004$  |

Table S1: CALIBER Linear epitope prediction performance of BiLSTM models on the Validation dataset. Comparing the different embedding methods: aa embedding, ESM-2, Kidera embedding, Kidera embedding + biochemical properties.

| Embedding  | Model    | AUC               | BAC               | MCC               | PR-AUC            |
|------------|----------|-------------------|-------------------|-------------------|-------------------|
| Random     | BiLSTM   | $0.67 \pm 0.0113$ | $0.62 \pm 0.0081$ | $0.15 \pm 0.0102$ | $0.19 \pm 0.0162$ |
| Kidera     | BiLSTM   | $0.69 \pm 0.0093$ | $0.64 \pm 0.0072$ | $0.16 \pm 0.0092$ | $0.21 \pm 0.0128$ |
| Kidera+bio | BiLSTM   | $0.71 \pm 0.0101$ | $0.65 \pm 0.0078$ | $0.18 \pm 0.0099$ | $0.23 \pm 0.0121$ |
| ESM-2      | BiLSTM   | $0.85 \pm 0.0055$ | $0.77 \pm 0.0054$ | $0.35 \pm 0.0103$ | $0.46 \pm 0.0116$ |
| ESM-2      | GCN      | $0.84 \pm 0.0049$ | $0.77 \pm 0.0047$ | $0.35 \pm 0.0087$ | $0.45 \pm 0.0101$ |
| ESM-2      | Boosting | $0.85 \pm 0.0019$ | $0.78 \pm 0.002$  | $0.37 \pm 0.0024$ | $0.46 \pm 0.0055$ |
| ESM-IF1    | BiLSTM   | $0.85 \pm 0.003$  | $0.77 \pm 0.0024$ | $0.36 \pm 0.0051$ | $0.47 \pm 0.0049$ |
| ESM-IF1    | GCN      | $0.84 \pm 0.0059$ | $0.76 \pm 0.0053$ | $0.34 \pm 0.0102$ | $0.44 \pm 0.0112$ |
| ESM-IF1    | Boosting | $0.84 \pm 0.0007$ | $0.76 \pm 0.0$    | $0.34 \pm 0.0013$ | $0.44 \pm 0.0018$ |

Table S2: CALIBER Conformational epitope prediction performance of BiLSTM, GCN, and boosting models on the Validation dataset. Comparing the different embedding methods: ESM-2 and ESM-IF1.

| ESM         | Model    | AUC   | BAC  | MCC  | PR-AUC |
|-------------|----------|-------|------|------|--------|
| ESM-IF1+RSA | BiLSTM   | 0.769 | 0.69 | 0.26 | 0.34   |
| ESM-IF1+RSA | GCN      | 0.768 | 0.69 | 0.26 | 0.32   |
| ESM-IF1+RSA | Boosting | 0.785 | 0.68 | 0.23 | 0.37   |
| ESM-2+RSA   | BiLSTM   | 0.762 | 0.69 | 0.27 | 0.31   |
| ESM-2+RSA   | GCN      | 0.749 | 0.69 | 0.25 | 0.29   |
| ESM-2+RSA   | Boosting | 0.768 | 0.68 | 0.23 | 0.33   |

Table S3: CALIBER Conformational epitope prediction performance of BiLSTM, GCN, and boosting models on the Test dataset. Comparing the different embedding methods: ESM-2 and ESM-IF1 concatenated to the RSA.

| Model    | Encoding | Epitope        | Threshold |
|----------|----------|----------------|-----------|
| BiLSTM   | Random   | Linear         | 0.1       |
| BiLSTM   | ESM-2    | Linear         | 0.12      |
| BiLSTM   | ESM-2    | Conformational | 0.29      |
| BiLSTM   | ESM-IF   | Conformational | 0.21      |
| BiLSTM   | ESM-2    | Both           | 0.15      |
| GCN      | ESM-2    | Conformational | 0.28      |
| GCN      | ESM-IF1  | Conformational | 0.21      |
| Boosting | ESM-IF1  | Conformational | 0.3       |
| Boosting | ESM-2    | Conformational | 0.3       |

Table S4: The selected threshold for each model, as it is calculated on the website.

| RSA     | CALIBER | BepiPred-3.0 |
|---------|---------|--------------|
| 0-0.2   | 0.729   | 0.683        |
| 0.2-0.4 | 0.705   | 0.676        |
| 0.4-0.6 | 0.684   | 0.65         |
| 0.6-0.8 | 0.701   | 0.699        |
| 0.8-1.0 | 0.711   | 0.708        |

**Table S5: Performance comparison of CALIBER and BepiPred-3.0 on the blind test set Epitope3D, on different ranges of RSA.**

| Length   | CALIBER | BepiPred-3.0 |
|----------|---------|--------------|
| 0-100    | 0.697   | 0.709        |
| 100-200  | 0.74    | 0.628        |
| 200-300  | 0.713   | 0.634        |
| 300-500  | 0.579   | 0.579        |
| 500-2000 | 0.76    | 0.745        |

**Table S6: Performance comparison of CALIBER and BepiPred-3.0 on the blind test set Epitope3D, on different ranges of chain length.**
